# Supplementary material for: N-doped graphene nanoribbons as efficient metal-free counter electrodes for disulfide/thiolate redox mediated DSSCs
Source: Royal Society of Chemistry journal article supplement (doi:10.1039/c4nr06969b), 2015-01-01
Supplement: c4nr06969b1.pdf [file c4nr06969b1.pdf]

## Supporting Information

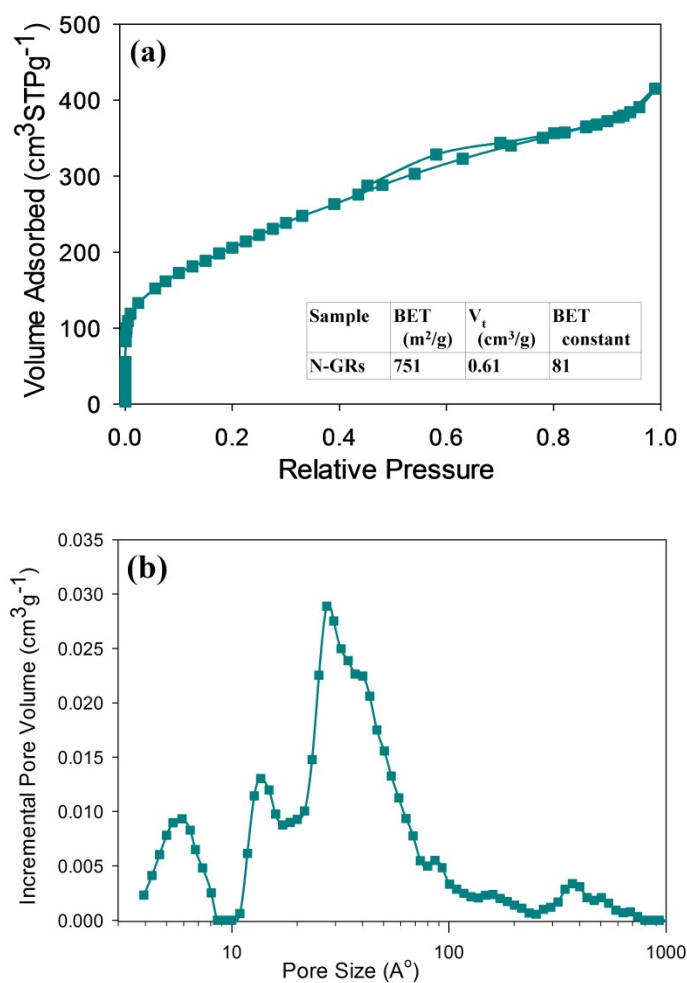

**Figure S1.** (a) The BET adsorption–desorption isotherm and BET surface area (inner form) of N-GNR. (b) BET pore size distribution of N-GNR.

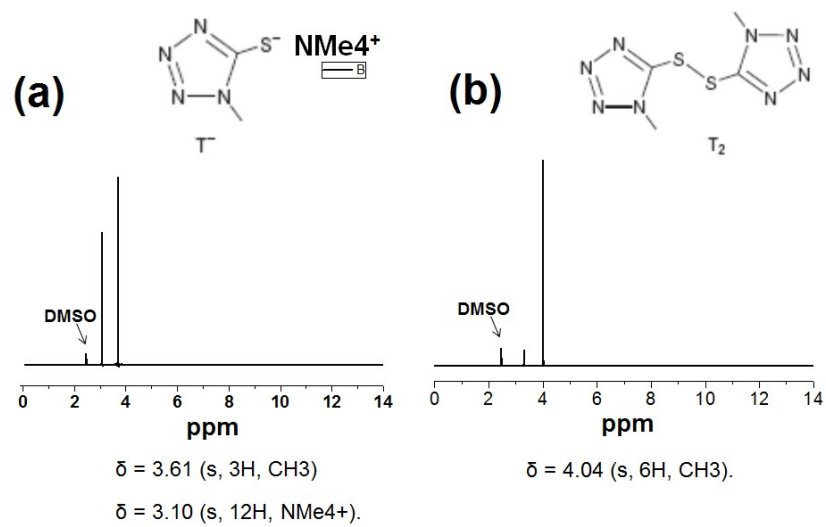

**Figure S2.** NMR spectra of  $T^-$  and  $T_2$ .
